# Supplementary material for: Intercropping of Euonymus japonicus with Photinia × fraseri Improves Phytoremediation Efficiency in Cd/Cu/Zn Contaminated Field
Source: MDPI journal article supplement (doi:10.3390/biology11081133), 2022-07-28
Supplement: s1 [file s1]

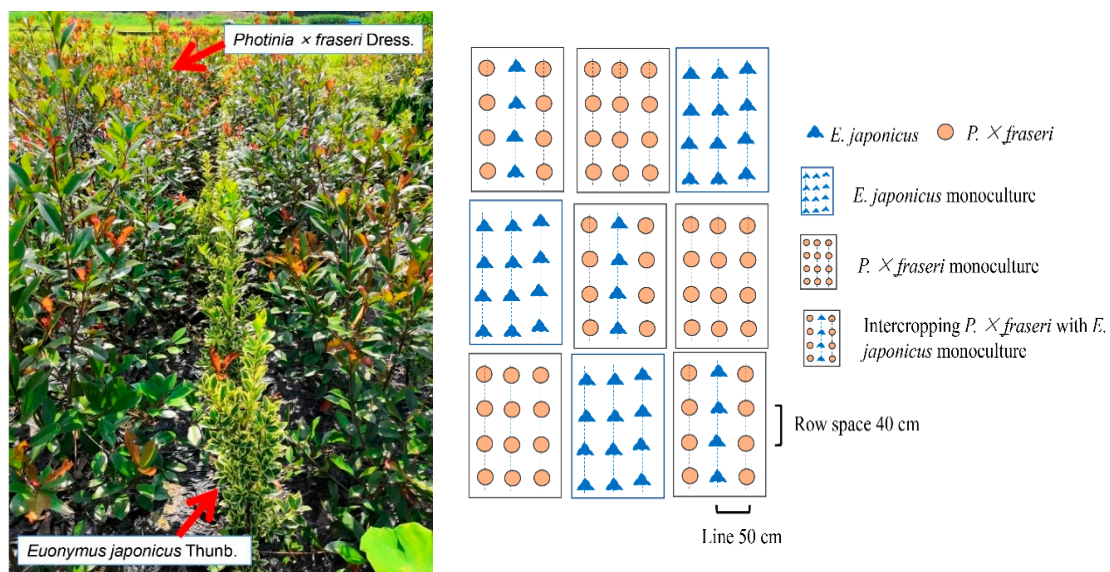

Figure.S1 Picture and schematic diagram of field experiment

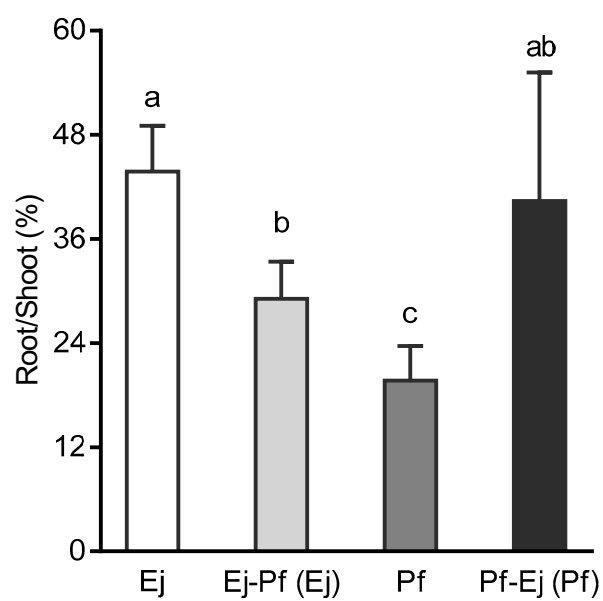

Figure.S2 The analysis of root/shoot ratio of *P. \times fraseri* and *E. japonicus* in monoculture and intercropping systems.
